# Supplementary material for: Revealing anisotropy and thickness dependence of Raman spectra for SnS flakes
Source: Royal Society of Chemistry journal article supplement (doi:10.1039/c7ra09430b), 2017-01-01
Supplement: c7ra09430b1.pdf [file c7ra09430b1.pdf]

## Supplementary Information

### Revealing Anisotropy and Thickness Dependence of Raman Spectra for SnS Flakes

Mingling Li,<sup>a</sup> Yiming Wu,<sup>a</sup> Taishen Li,<sup>a</sup> Yulin Chen,<sup>a</sup> Huaiyi Ding,<sup>a</sup> Yue Lin,<sup>a</sup> Nan Pan<sup>abc</sup> and  
Xiaoping Wang<sup>\*abc</sup>

<sup>a</sup>*Hefei National Laboratory for Physical Sciences at the Microscale and Department of Physics,  
University of Science and Technology of China, Hefei, Anhui 230026, P.R. China.*

E-mail: [xpwang@ustc.edu.cn](mailto:xpwang@ustc.edu.cn)

<sup>b</sup>*Synergetic Innovation Center of Quantum Information & Quantum Physics, University of Science and  
Technology of China, Hefei, Anhui 230026, P. R. China.*

<sup>c</sup>*Key Laboratory of Strongly-Coupled Quantum Matter Physics, Chinese Academy of Sciences, School  
of Physical Sciences, University of Science and Technology of China, Hefei, Anhui 230026, P. R. China.*

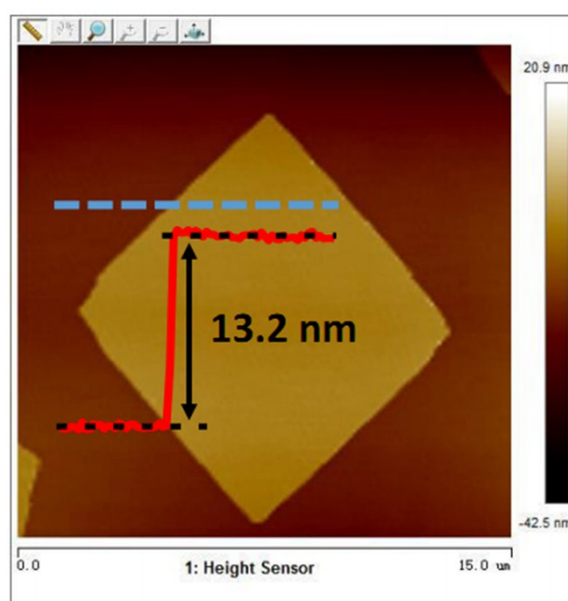

**Fig. S1** AFM image of 13.2 nm SnS flake on mica substrate before transfer.

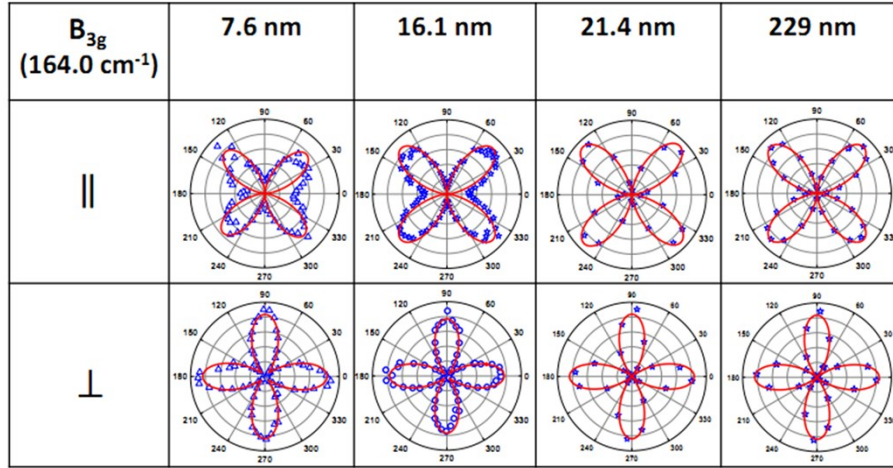

**Fig. S2** Polar plots of Raman intensities of  $B_{3g}$  (164.0  $\text{cm}^{-1}$ ) of different thick SnS flakes with 632.8 nm laser excitation under parallel and perpendicular polarization configurations, respectively. The red curves are fitting results according to eqn (2) and eqn (4) in the main text.

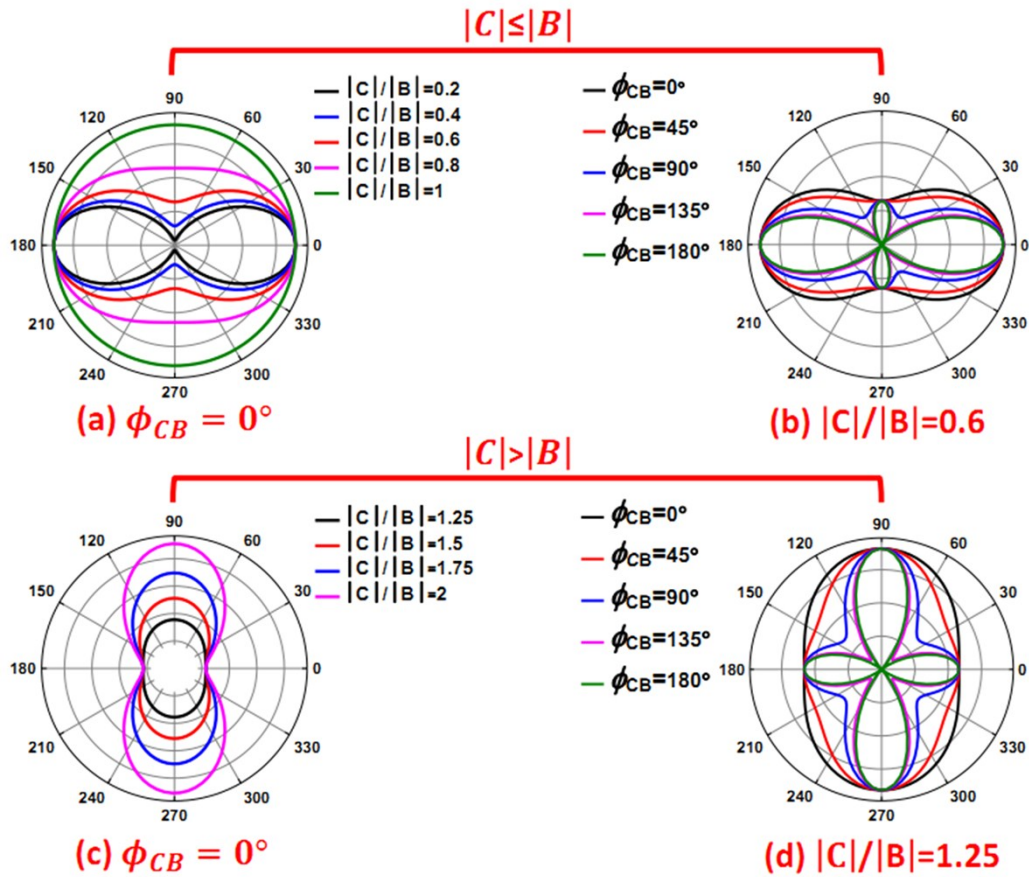

**Fig. S3** The calculated polar plots of  $A_g$  ( $\parallel$ ) mode with different parameters of  $|C|/|B|$  and  $\phi_{CB}$  according to eqn (1) in the main text.

As shown in Fig. S2,  $|C|^2/|B|^2$  is equal to the intensity ratio of the zigzag direction to the armchair direction. When  $|C| < |B|$ , the maximum values of the polar plots are along armchair direction (a,b). However, the maximum values of the polar plots become along zigzag direction if  $|C| > |B|$  (c,d).  $\phi_{CB}$  determines the concave degree of the intensity pattern along nearby  $45^\circ$  (or  $225^\circ$ ) and  $135^\circ$  (or  $315^\circ$ ) (b, d).

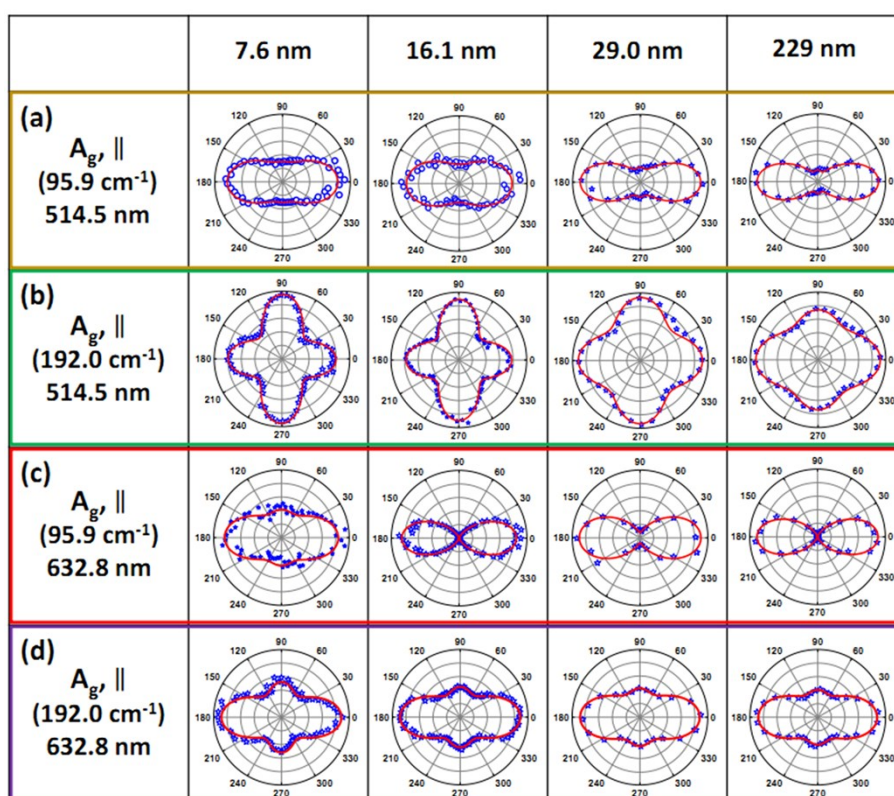

**Fig. S4** Polar plots of Raman intensities of  $A_g$  (95.9  $\text{cm}^{-1}$ ,  $\parallel$ ) and  $A_g$  (192.0  $\text{cm}^{-1}$ ,  $\parallel$ ) for different thick SnS flakes with 514.5 nm and 632.8 nm laser excitation, respectively. The red curves are fitting results.

As shown in Fig. S3, the maximum intensity values of  $A_g$  (95.9  $\text{cm}^{-1}$ ,  $\parallel$ ) mode for SnS flakes with different thicknesses are always along armchair direction and their polar plots are more anisotropic than those corresponding to  $A_g$  (192.0  $\text{cm}^{-1}$ ,  $\parallel$ ). So  $A_g$  (95.9  $\text{cm}^{-1}$ ) is a more reliable way than  $A_g$  (192.0  $\text{cm}^{-1}$ ) to identify the crystalline orientation of SnS.

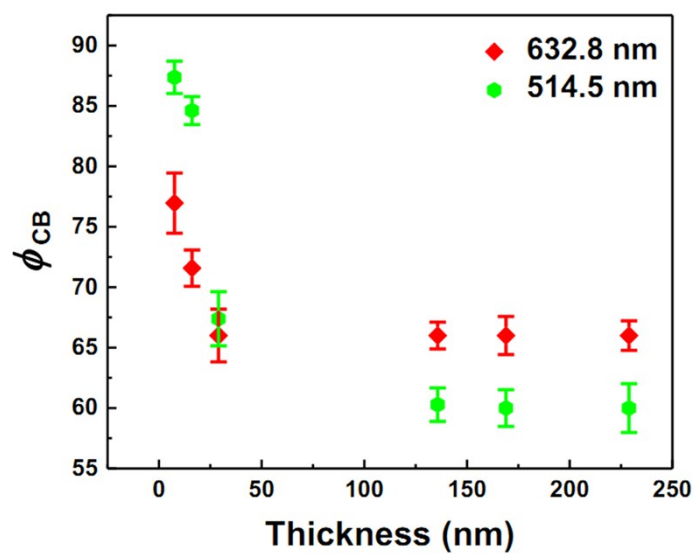

**Fig. S5** Variation of  $\phi_{CB}$  with the thickness of SnS flake for  $A_g$  ( $192.0\text{ cm}^{-1}$ ) mode with 514.5 nm and 632.8 nm laser excitation, respectively.
